# Supplementary material
Source: PubMed Central journal article supplement (PMC4517238)
Supplement: pnas.1510077112.sapp.pdf [file pnas.1510077112.sapp.pdf]

## Supplementary Figure Legends

### **Figure S1. Variant sequences of *Bombyx* cytoplasmic tRNA<sup>AspGUC</sup> (A) and tRNA<sup>HisGUG</sup> (B)**

According to RACE analyses, tRNA halves from tRNA<sup>AspGUC</sup> in BmN4 cells were derived from variant 1 (shown in square).

### **Figure S2. RACE identification of 5'-tRNA<sup>HisGUG</sup> half sequences in *Bombyx* BmN4 cells**

The cloverleaf secondary structure of the *Bombyx* cytoplasmic tRNA<sup>HisGUG</sup> is shown. Sequences of the tRNA halves derived from the tRNA<sup>HisGUG</sup> were identified by RACE analysis. All 3'-RACE products (10 out of 10) cloned from 5'-tRNA halves had 3'-terminal positions at np 34. 5'-RACE for 3'-tRNA half failed to amplify detectable bands, most likely because the m<sup>1</sup>G modification at np 37 inhibited reverse transcription.

### **Figure S3. Variant sequences of human cytoplasmic tRNA<sup>AspGUC</sup> (A) and tRNA<sup>HisGUG</sup> (B)**

### **Figure S4. RACE identification of the sequences of tRNA halves derived from tRNA<sup>AspGUC</sup> and tRNA<sup>HisGUG</sup> in human BT-474 cells**

(A) RNAs extracted from HeLa and BT-474 cells were subjected to RACE analyses for sequence identification of tRNA halves derived from human cytoplasmic tRNA<sup>AspGUC</sup> and tRNA<sup>HisGUG</sup>. RACE reactions from BT-474 RNA, but not those from HeLa RNA, yielded clear amplified bands for the 5'- and 3'-tRNA<sup>AspGUC</sup> halves and 5'-tRNA<sup>HisGUG</sup> half, which is consistent with the abundant expression of the tRNA halves in BT-474 cells and the barely detectable expression in HeLa cells (**Fig. 2A**). RACE for 3'-tRNA<sup>HisGUG</sup> half failed to amplify

detectable bands, most likely because the m<sup>1</sup>G modification at np 37 inhibited reverse transcription.

**(B)** The cloverleaf secondary structures of the human cytoplasmic tRNA<sup>AspGUC</sup>-V1 and tRNA<sup>HisGUG</sup>-V1 are shown. All 3'-RACE products cloned from the 5'-tRNA halves (15 out of 15 from 5'-tRNA<sup>AspGUC</sup>, and 13 out of 13 from 5'-tRNA<sup>HisGUG</sup>) had 3'-terminal positions at np 34. The majority of the 5'-RACE products (9 out of 10) cloned from 3'-tRNA<sup>AspGUC</sup> halves had 5'-terminal positions at np 35, while np 36 was the 5'-terminal position in one clone.

**Figure S5. Entire gel picture whose designated region (red square) was shown in Fig. 2C**

**Figure S6. Reduction of tRNA halves upon siRNA knockdown of ANG**

**(A)** BT-474 cells were transfected with control (Ctrl) siRNA or the two different siRNAs targeting the ANG gene. Total RNA was extracted from the cells after 72 h of transfection. ANG mRNA was quantified by real-time qRT-PCR. Expression levels from control siRNA-treated cells were set as 1 and relative expression levels of ANG mRNAs are indicated. Each data set represents the average of three independent experiments with bars showing the SD.

**(B)** Mature tRNA<sup>AspGUC</sup>, 5'-tRNA<sup>AspGUC</sup>, and miR-16 (negative control) in total RNA extracted from ANG siRNA-treated cells were detected by Northern blot. The Northern blot bands were quantified and shown as relative abundance; amounts in control cells were set as 1.

**Figure S7. Alteration of hormone status did not influence ANG and RNH1 expression levels**

(A) LNCaP-FGC cells were cultured in medium containing normal FBS or hormone-free CS-FBS. After culturing for 120 h, total RNA was extracted and ANG and RNH1 mRNA levels were quantified by real-time qRT-PCR. Expression levels in the cells cultured with normal FBS were set as 1, and average of three independent experiments with SD values are shown.

(B) By Western blots, RNH1 protein levels were examined in LNCaP-FGC cells cultured with FBS or CS-FBS for 120 h. The levels of  $\beta$ -tubulin were also examined as a control.

**Figure S8. siRNA targeting SHOT-RNA reduced the levels of the SHOT-RNA without affecting mature tRNA levels**

(A) LNCaP-FGC cells were transfected with control siRNA or siRNA targeting 5'-SHOT-RNA<sup>LysCUU</sup>. After 72 h of transfection, total RNA was extracted and subjected to Northern blot to detect 5'-SHOT-RNA<sup>LysCUU</sup> and mature tRNA<sup>LysCUU</sup>. The asterisk indicates the detection of one of the strands of the transfected siRNA.

(B) The Northern blot bands were quantified and shown as relative abundance; amounts in control cells were set as 1.

**Figure S9. Variant sequences of human cytoplasmic tRNA<sup>LysCUU</sup> (A), tRNA<sup>GluCUC</sup> (B), tRNA<sup>ValAAC</sup> (C), tRNA<sup>ValCAC</sup> (D), tRNA<sup>GlnCUG</sup> (E), tRNA<sup>LysUUU</sup> (F), and tRNA<sup>GlyGCC</sup> (G)**

Among 5'-SHOT-RNA<sup>LysCUU</sup> reads shown in Fig 5D, 24.4%, 0.25%, 0.2%, and 75.2% were derived from tRNA<sup>LysCUU</sup>-V1, V2, -V1/V2, and -V3/V4, respectively. Among 5'-SHOT-RNA<sup>GluCUC</sup> reads, 84.5% and 15.5% were derived from tRNA<sup>GluCUC</sup>-V1/V2, and -V1/V2/V5. Among 5'-SHOT-RNA<sup>LysUUU</sup> reads, 49.8% and 50.2% were derived from tRNA<sup>LysUUU</sup>-V1/V2, and -V1/V2/V3. All 5'-SHOT-RNA<sup>ValAAC/CAC</sup> reads were derived from tRNA<sup>ValAAC</sup>-V1/V2 or

tRNA<sup>ValCAC</sup>-V1/V2/V3. All reads of 5'-SHOT-RNA<sup>HisGUG</sup>, 5'-SHOT-RNA<sup>GlnCUG</sup>, 5'-SHOT-RNA<sup>AspGUC</sup>, and 5'-SHOT-RNA<sup>GlyGCC</sup> were derived from tRNA<sup>HisGUG</sup>-V1, tRNA<sup>GlnCUG</sup>-V1/V2/V3, tRNA<sup>AspGUC</sup>-V1, and tRNA<sup>GlyGCC</sup>-V1, respectively.

**Table S1. Sequences of adapters and primers for RACE analysis**

| RACE    | Adapter/primer                                | Sequence (5'–3')                 |
|---------|-----------------------------------------------|----------------------------------|
| 5'-RACE | 5'-RNA adapter                                | GUUCAGAGUUCUACAGUCCGACGAUC       |
|         | 3'-tRNA <sup>AspGUC</sup> half-forward primer | GTTCAGAGTTCTACAGTCCGACGATC       |
|         | 3'-tRNA <sup>AspGUC</sup> half-reverse primer | TGGCTCCCCGTCGGGGAATC             |
| 3'-RACE | 3'-RNA adapter                                | 5phos/UGGAAUUCUCGGGUGCCAAGG/3ddC |
|         | 5'-tRNA <sup>AspGUC</sup> half-forward primer | GCGGTCCTCGTTAGTATAGT             |
|         | 5'-tRNA <sup>HisGUG</sup> half-forward primer | GCTCGCCGTGATCGTATAGT             |
|         | Common reverse primer                         | GCCTTGGCACCCGAGAATTCCA           |

**Table S2. Sequences of probes for Northern blot analysis**

| Target                                       | Sequence (5'–3')                                      |
|----------------------------------------------|-------------------------------------------------------|
| <i>Bombyx</i> 5'-tRNA <sup>AspGUC</sup> half | GGGATACTGACCACTATACTACCGAAGA                          |
| <i>Bombyx</i> 3'-tRNA <sup>AspGUC</sup> half | CGGCGGGGAATCGAACCCCGGTCTCCC                           |
| <i>Bombyx</i> 5'-tRNA <sup>HisGUG</sup> half | GGGTCCTA <u>ACC</u> ACTAGACGA                         |
| <i>Bombyx</i> 3'-tRNA <sup>HisGUG</sup> half | AA <u>ATT</u> <u>CGA</u> <u>AC</u> CTGGGTT <u>ACT</u> |
| human 5'-tRNA <sup>AspGUC</sup> half         | GGGATACTCACCACTATACTAACGAGGA                          |
| human 3'-tRNA <sup>AspGUC</sup> half         | GTCGGGGGAATCGAACCCCGGTCTCC                            |
| human 5'-tRNA <sup>HisGUG</sup> half         | CAGAGTACTA <u>ACC</u> ACTATA <u>CG</u> ATCACGGC       |
| human 3'-tRNA <sup>HisGUG</sup> half         | GCCGTGACTCGGATTCGAACCGAGGTT                           |
| human 5'-tRNA <sup>LysCUU</sup> half         | GTCTCATGCTCTACCGACT                                   |

All synthetic probes and primers used in this study were synthesized by Integrated DNA Technologies. Locked Nucleic Acid (LNA)-modified probes were used for the detection of *Bombyx* 5'- and 3'-tRNA<sup>HisGUG</sup> halves (underlined letters designate LNA).

**Table S3. Sequences of the sense strand of siRNAs with 3'-overhangs, which were designed using siExplorer (46)**

| Target                         | Sequence (5'-3')        |
|--------------------------------|-------------------------|
| ANG-1                          | AAACCUAAGAAUAAGCAAGUCAU |
| ANG-2                          | CCUAAGAAUAAGCAAGUCUAU   |
| 5'-SHOT-RNA <sup>Lys</sup> CUU | AGCUCAGUCGGUAGAGCAUUU   |
| 5'-SHOT-RNA <sup>Asp</sup> GUC | GUUAGUAUAGUGGUGAGUAUU   |
| 5'-SHOT-RNA <sup>His</sup> GUG | UCGUAUAGUGGUUAGUACUUU   |
| 3'-SHOT-RNA <sup>Asp</sup> GUC | GCGGGAGACCGGGGUUCGAUU   |

**Table S4. Sequences of primers for real-time qRT-PCR**

| Primer                  | Sequence (5'-3')         |
|-------------------------|--------------------------|
| ANG-forward primer      | AGAAGCGGGTGAGAAACAAAAC   |
| ANG-reverse primer      | AGTGCTGGGTCAGGAAGTGTG    |
| GAPDH-forward primer    | GTCTTCACCACCATGGAGAAGG   |
| GAPDH-reverse primer    | ATGATCTTGAGGCTGTTGTCAT   |
| U6 snRNA-forward primer | TCGCTTCGGCAGCACATATAC    |
| U6 snRNA-reverse primer | CGAATTTGCGTGTCATCCTTG    |
| ESR1-forward primer     | CGGCTCCGTAATGCTACGA      |
| ESR1-reverse primer     | TGGCAGCTCTCATGTCTCCA     |
| AR-forward primer       | AGCTCACCAAGCTCCTGGACTC   |
| AR-reverse primer       | TTGGGCACTTGCACAGAGATG    |
| HER2-forward primer     | CAGAGCAGCTCCAAGTGTTTG    |
| HER2-reverse primer     | GGTTCTGGAAGACGCTGAGG     |
| RNH1-forward primer     | AACAACAGGCTGGAGGATGC     |
| RNH1-reverse primer     | TCACGCAGGCTGTGGTTG       |
| 5S rRNA-forward primer  | TACGGCCATACCACCCTGAAC    |
| 5S rRNA-reverse primer  | CGGTCTCCCATCCAAGTACTAACC |

**Table S5. Sequences of adapters and primers for SHOT-RNA quantification by TaqMan qRT-PCR**

| Target                     | Adapter/primer | Sequence (5'–3')                                                |
|----------------------------|----------------|-----------------------------------------------------------------|
| 5'-tRNA <sup>Asp</sup> GUC | 3'-RNA adaptor | /5Phos/GAACACUGCGUUUGCUGGCCUUUGAGAGUU<br>CUACAGUCCGACGAUC/3ddC/ |
|                            | TaqMan probe   | /56FAM/TATCCCCGC/ZEN/CTGGAACACTGCGTTT/3<br>IABkFQ/              |
|                            | Forward primer | GCGGTCCTCGTTAGTATAGT                                            |
|                            | Reverse primer | GATCGTCGGACTGTAGAACTC                                           |
| 5'-tRNA <sup>His</sup> GUG | 3'-RNA adaptor | /5Phos/GAACACUGCGUUUGCUGGCCUUUGAGAGUU<br>CUACAGUCCGACGAUC/3ddC/ |
|                            | TaqMan probe   | /5HEX/TAGTACTCT/ZEN/GCGTTGGAACACTGCGTT<br>TGC/3IABkFQ/          |
|                            | Forward primer | GCTCGCCGTGATCGTATAGT                                            |
|                            | Reverse primer | GATCGTCGGACTGTAGAACTC                                           |
| 5'-tRNA <sup>Lys</sup> CUU | 3'-RNA adaptor | /5Phos/GAACACUGCGUUUGCUGGCCUUUGAGAGUU<br>CUACAGUCCGACGAUC/3ddC/ |
|                            | TaqMan probe   | /56FAM/AGAGCATGG/ZEN/GACTCGAACACTG/3IA<br>BkFQ/                 |
|                            | Forward primer | GCCCCGGCTAGCTCAG                                                |
|                            | Reverse primer | GATCGTCGGACTGTAGAACTC                                           |
| 3'-tRNA <sup>Asp</sup> GUC | 5'-RNA adaptor | GAACACUGCGUUUGCUGGCCUUUGAUGAAAGUUC<br>AGAGUUCUACAGUCCGACGAUC    |
|                            | TaqMan probe   | /56FAM/CAGTCCGAC/ZEN/GATCTCACGCGGGAGA<br>C/3IABkFQ/             |
|                            | Forward primer | GAACACTGCGTTTGGCTGGCTTTGATG                                     |
|                            | Reverse primer | TGGCTCCCCGTCGGGGAATC                                            |
| 5'-tRNA <sup>Glu</sup> CUC | 3'-RNA adaptor | /5Phos/GAACACUGCGUUUGCUGGCCUUUGAGAGUU<br>CUACAGUCCGACGAUC/3ddC/ |
|                            | TaqMan probe   | /56FAM/CGCTCGAAC/ZEN/ACTGCGTTTG/3IABkFQ/                        |
|                            | Forward primer | TCCCTGGTGGTCTAGTGG                                              |
|                            | Reverse primer | GATCGTCGGACTGTAGAACTC                                           |

**Table S6. Sequences of adapters and primers for mature tRNA quantifications by FL-PCR**

| Adapter/primer                                     | Sequence (5'–3')                      |
|----------------------------------------------------|---------------------------------------|
| Stem-loop adapter                                  | /5Phos/TCGTAGGGTCCGAGGTATTCACGATGrGrC |
| tRNA <sup>Lys</sup> <sup>CUU</sup> -forward primer | GTTCGAGCCCCACGTT                      |
| tRNA <sup>Lys</sup> <sup>CUU</sup> -reverse primer | ACTGAGCTAGCCGGGC                      |
| tRNA <sup>Asp</sup> <sup>GUC</sup> -forward primer | CGGGAGACCGGGGTTTCGATT                 |
| tRNA <sup>Asp</sup> <sup>GUC</sup> -reverse primer | CGGGGATACTCACCCTATACTAACGAGGA         |

A, G, C, and T designate DNA, whereas rG and rC designate RNA.



A

|                             |                                                                                   | Genome loci |
|-----------------------------|-----------------------------------------------------------------------------------|-------------|
| tRNA <sup>AspGUC</sup> -V1  | <b>TCCTCGGTAGTATAGTGG--TCAGTATCCCCGCTGTCACGCGGGAGACCGGGGTTCGATTCCCCCGCCGGAGAG</b> | 12          |
| tRNA <sup>AspGUC</sup> -V2  | TCCTCGGTAGTATAGTGG--TCAGTATCCCGCCTGTCACGCGGGAGACCGGGGTTCGATTCCCCCGCCGGGGAG        | 3           |
| tRNA <sup>AspGUC</sup> -V3  | TCCTCGGTAGTATAGTGG--TTAGTATGGCCGCTGTCACGCGGAAGACCGGGGTTCGATTCCCCCGCCGGGGAG        | 3           |
| tRNA <sup>AspGUC</sup> -V4  | TCCTCGGTAGTATAGTGG--TGAGTATACTCGCCTGTCACGCGAGAGACCGGGGTTCGATTCCCCCGCCGGGGAG       | 1           |
| tRNA <sup>AspGUC</sup> -V5  | TCCTCGGTAGTACAGTGGG--TCAGTATACTCGCCTGTCACGCGAGAGACCGGGGTTCGATCCCCCGGCCGGGGAG      | 1           |
| tRNA <sup>AspGUC</sup> -V6  | TCCTCGGTAGTATAGTGG--TGAGTATGCACGCTGTCACGCGTGAGACCGGGGTTCGATTCCCCCGCCGGGGAG        | 1           |
| tRNA <sup>AspGUC</sup> -V7  | TCCTCGGTAGTACAGTGGG--TCAGTATGCTCGCCTGTCACGTGAGAGACCGGGGTTCGATCCCCCGCCGAGGAG       | 1           |
| tRNA <sup>AspGUC</sup> -V8  | TCCTCGGTAGTACAGTGGG--TCAGTATGCTCGCCTGTCACGCGAGAGACCGGGGTTCGAGCCCCGCCGAGGAG        | 1           |
| tRNA <sup>AspGUC</sup> -V9  | TCCTCGGTAGTACAGTGGG--TCAGTATGCTCGCCTGTCACGCGAGAGACCGGGGTTCGAGCCCCGCCGAGGAG        | 1           |
| tRNA <sup>AspGUC</sup> -V10 | TCCTCGGTAGTACAGTGGG--TCAGTATACTCGCCTGTCACGCGAGAGAACCGGGGTTCGATCCCCCGCGGGGAG       | 4           |
| tRNA <sup>AspGUC</sup> -V11 | TCCTCGGTAGTACAGTGGG--TCAGTATGCTCGCCTGTCACGTGAGAGACCGGGGTTCGAGCCCCGCCGAGAAG        | 1           |
| tRNA <sup>AspGUC</sup> -V12 | TCATCAGCAGTACAGTAGG--TCAGTATGCTCGCCTGTCACACGAGAGACCGGGGTTCGATCCCCCGCCGGGGAG       | 1           |
| tRNA <sup>AspGUC</sup> -V13 | TCATCGGTAGTACAGTGGGGTCAGTATGCTCGCTTGTCACACGAGAGACCGGGGTTCGAAACCCCCGCCGGGAG.       | 1           |
| tRNA <sup>AspGUC</sup> -V14 | TCCTTGTTAGTATAGTGG--TGAATATATTGCGCCTGTCACAAGAGACTGGGCTTAAATTCCCCCCCAAGGAG         | 1           |

B

|                        |                                                                          | Genome loci |
|------------------------|--------------------------------------------------------------------------|-------------|
| tRNA <sup>HisGUG</sup> | GCCGTGATCGTCTAGTGGTTAGGACCCTACGTTGTGGCCGTAGTAACCCAGGTTCGAATCCTGGTCACGGCA | 14          |

*Honda et al. Figure S1*

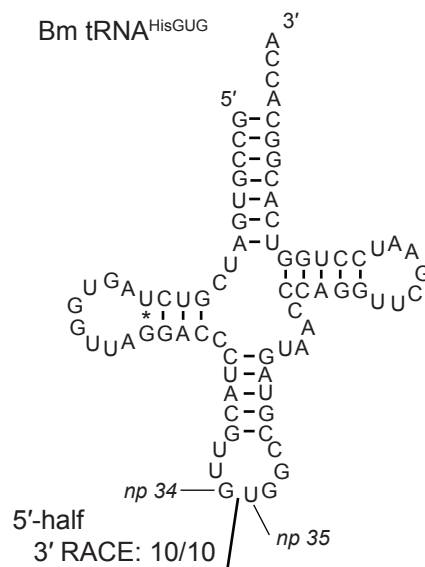

*Honda et al. Figure S2*

**A**

Genome loci

|                             |                                                                                                                                                                                         |    |
|-----------------------------|-----------------------------------------------------------------------------------------------------------------------------------------------------------------------------------------|----|
| tRNA <sup>AspGUC</sup> _V1  | TCCTCGTTAGTATAGTGGTGGTGCAGTATCCCCGCCTGTCACGCGGGAGACCGGGGTTTCGATTCCCCGACGGGGAG                                                                                                           | 11 |
| tRNA <sup>AspGUC</sup> _V2  | TCCTCGTTAGTATAGTGGT <b>T</b> AGTATCCCCGCCTGTCACGCGGGAGACCGGGGTT <b>C</b> AATCCCCGACGGGGAG                                                                                               | 1  |
| tRNA <sup>AspGUC</sup> _V3  | TCCTCGTTAGTATAGTGGTGGT <b>G</b> TCCCC <b>G</b> TCTGTCACGCGGGAGACCGGGGTTTCGATTCCCCGACGGGGAG                                                                                              | 1  |
| tRNA <sup>AspGUC</sup> _V4  | TCCTCGTTAGTAT <b>G</b> GTGGTGGTATCCC <b>T</b> GCCTGTCACGCGGGAGACCGGGGTTTCGATTCCCC <b>A</b> ACGGGGAG                                                                                     | 1  |
| tRNA <sup>AspGUC</sup> _V5  | TCCT <b>C</b> AT <b>C</b> AGTATAGTGGTGGTGCAGTATCCCCGCCTGTCACGCGGGAGAC <b>T</b> GGGGTTTCGATTCCC <b>T</b> GAG <b>G</b> AGGAG                                                              | 1  |
| tRNA <sup>AspGUC</sup> _V6  | <b>T</b> ACTCGTTAGTATAGTGGT <b>G</b> CGTATCCCC <b>G</b> TCTGTCACGCGGGAGAG <b>G</b> CGGGGTT <b>C</b> G <b>C</b> TCTCCCCGACGGGGAG                                                         | 1  |
| tRNA <sup>AspGUC</sup> _V7  | TCCT <b>T</b> GT <b>T</b> ACTATAGTGGTGGTGCAGTAT <b>C</b> T <b>G</b> CCCTGTCAT <b>G</b> CG <b>T</b> GAGAGAGGGGG <b>T</b> TCGATTCCCCGACGGGGAG                                             | 1  |
| tRNA <sup>AspGUC</sup> _V8  | <b>T</b> TCT <b>T</b> GT <b>T</b> A <b>A</b> TATAGTGGTGGTGCAGTAT <b>T</b> CCC <b>A</b> CTGTCAT <b>G</b> CGGGAG <b>A</b> -CGGGGTT <b>C</b> AAT <b>T</b> CCC <b>T</b> GAT <b>T</b> GGGGAG | 1  |
| tRNA <sup>AspGUC</sup> _V9  | TCCT <b>T</b> GT <b>T</b> ACTATAGTGGT <b>A</b> AGTAT <b>C</b> T <b>T</b> GCCTGTCAT <b>G</b> CAT <b>G</b> AGAGAGGGGG <b>T</b> TCGATTCCC <b>T</b> GACGGGGAG                               | 1  |
| tRNA <sup>AspGUC</sup> _V10 | TCCT <b>T</b> GT <b>T</b> AGTATAGTGGTGGT <b>G</b> T <b>T</b> T <b>T</b> GCCTGTCAT <b>G</b> T <b>G</b> -GAGACT <b>G</b> G <b>A</b> G <b>T</b> T <b>T</b> GAGTCCCC <b>A</b> ACAGGGAG      | 1  |

**B**

Genome loci

|                            |                                                                                                                                                          |   |
|----------------------------|----------------------------------------------------------------------------------------------------------------------------------------------------------|---|
| tRNA <sup>HisGUG</sup> _V1 | GCCGTGATCGTATAGTGGTTAGTACTCTGCGTTGTGGCCGAGCAACCTCGGTTTCGAATCCGAGTCACGGCA                                                                                 | 9 |
| tRNA <sup>HisGUG</sup> _V2 | GCC <b>A</b> TGATCGTATAGTGGTTAGTACTCTGCG <b>C</b> TGTGGCCGAGCAACCTCGGTTTCGAATCCGAGTCACGGCA                                                               | 1 |
| tRNA <sup>HisGUG</sup> _V3 | GC <b>A</b> GTG <b>A</b> CTGTATAGTGGTTAG <b>C</b> ACTCTG <b>T</b> GTTGTGGCC <b>A</b> CAGCAACC <b>A</b> TGGTT <b>C</b> AAAT <b>T</b> GAGTCAT <b>G</b> ACA | 1 |

*Honda et al. Figure S3*

**A**

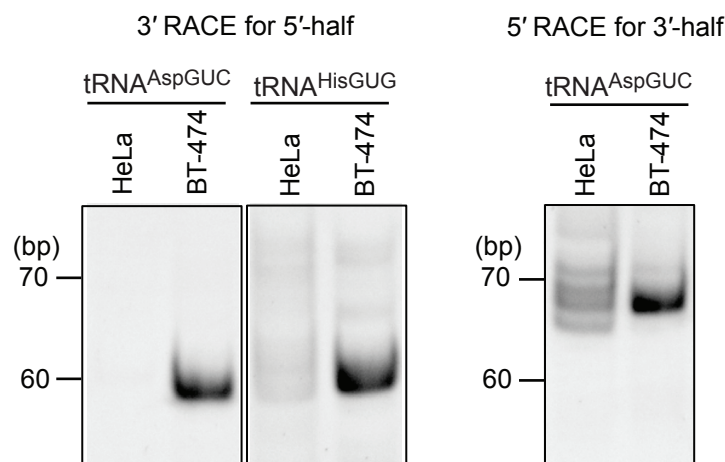

**B**

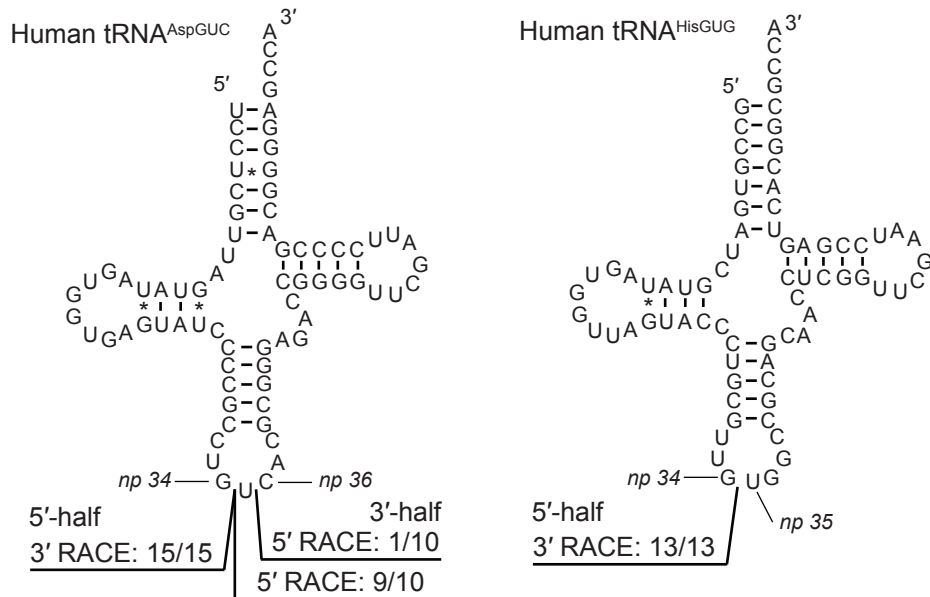

*Honda et al. Figure S4*

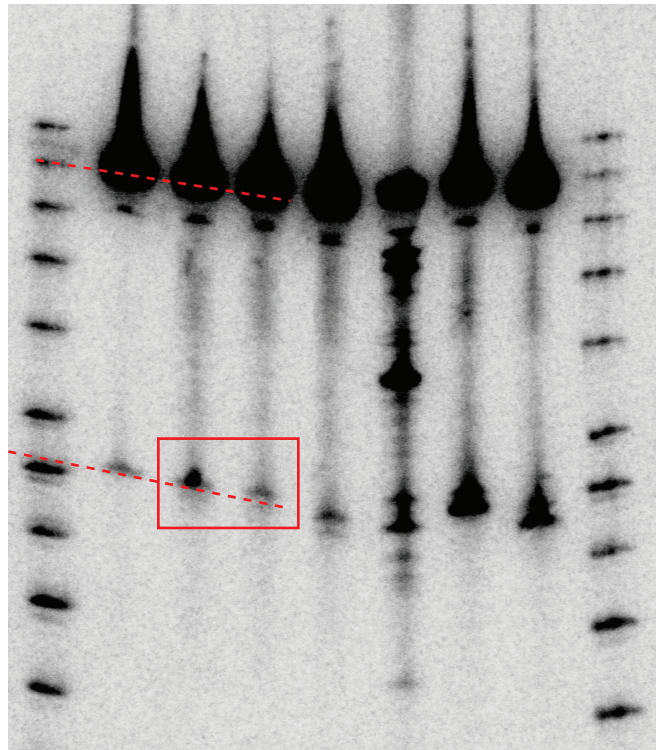

*Honda et al. Figure S5*

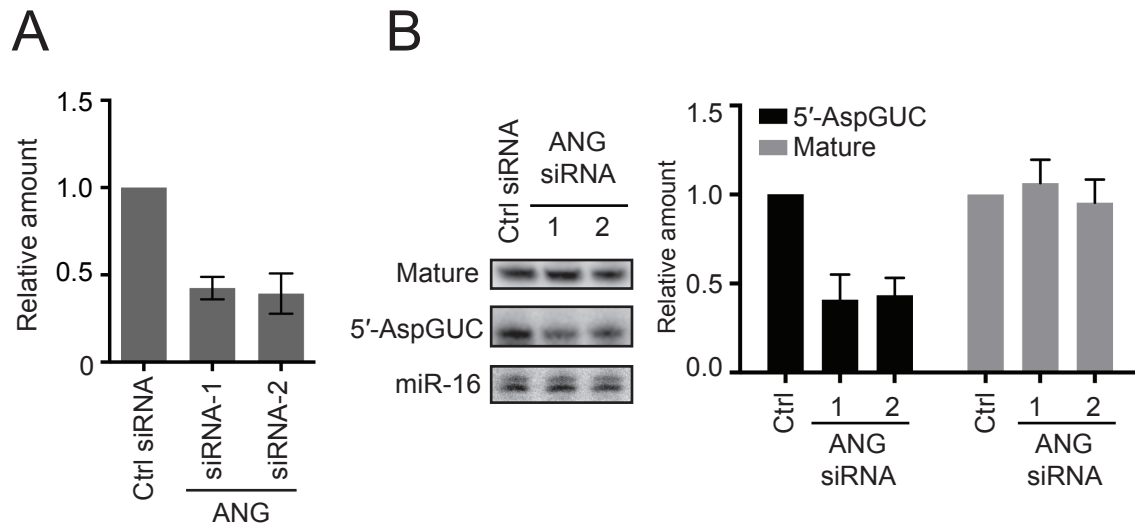

*Honda et al. Figure S6*

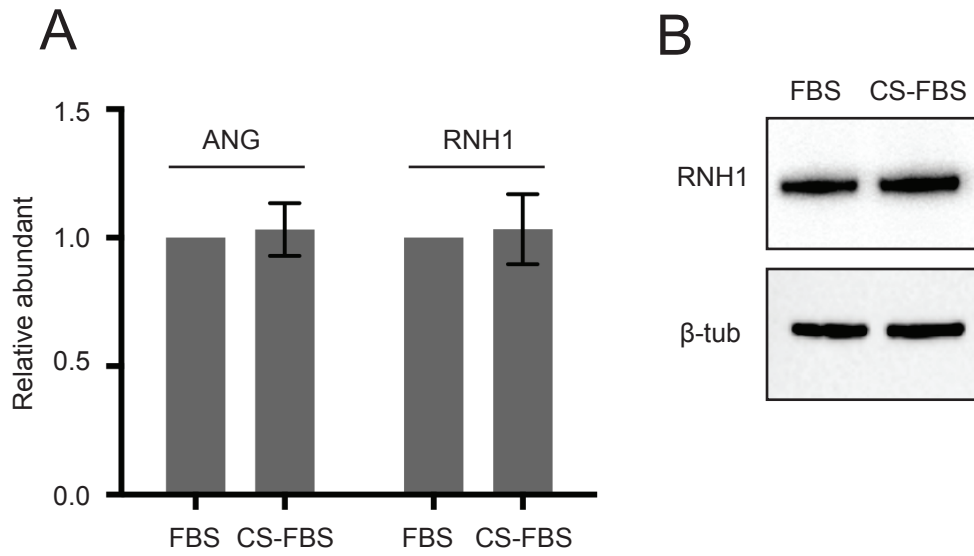

*Honda et al. Figure S7*

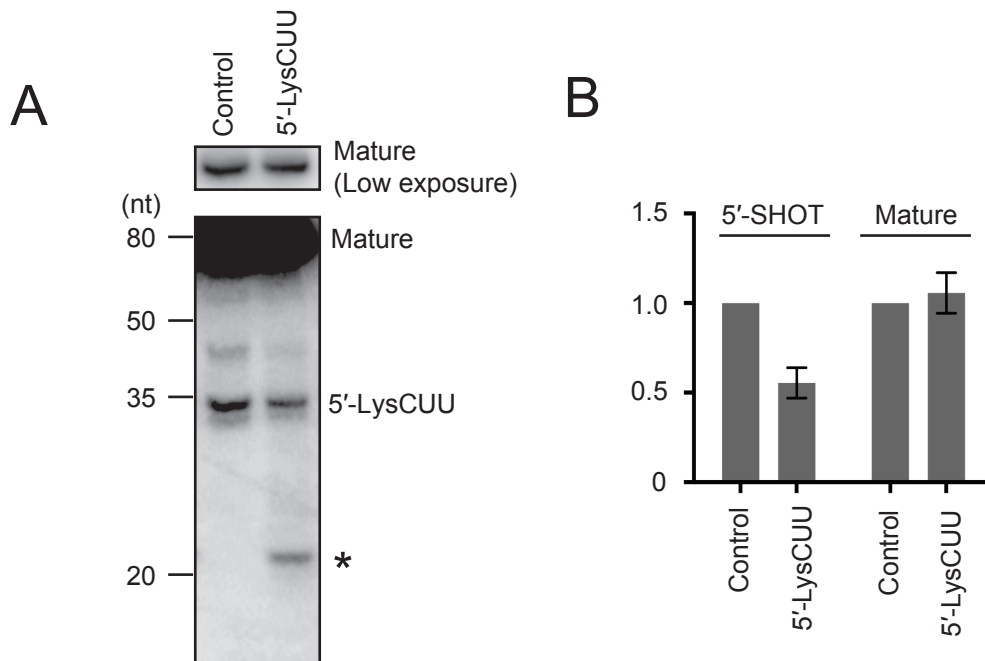

*Honda et al. Figure S8*

**A**

|                             |                                                                              | Genome loci |
|-----------------------------|------------------------------------------------------------------------------|-------------|
| tRNA <sup>Lys</sup> CUU_V1  | GCCCCGGCTAGCTCAGTCGGTAGAGCATGAGACTCTTAATCTCAGGGTC-GTGGGTTTCGAGCCCCACGTTGGGCG | 5           |
| tRNA <sup>Lys</sup> CUU_V2  | GCCCCGGCTAGCTCAGTCGGTAGAGCATGAGACCCTTAATCTCAGGGTC-GTGGGTTTCGAGCCCCACGTTGGGCG | 1           |
| tRNA <sup>Lys</sup> CUU_V3  | GCCCCGGCTAGCTCAGTCGGTAGAGCATGGGACTCTTAATCTCAGGGTC-GTGGGTTTCGAGCCCCACGTTGGGCG | 1           |
| tRNA <sup>Lys</sup> CUU_V4  | GCCCCGGCTAGCTCAGTCGGTAGAGCATGGGACTCTTAATCCAGGGTC-GTGGGTTTCGAGCCCCACGTTGGGCG  | 2           |
| tRNA <sup>Lys</sup> CUU_V5  | GCCCCGGCTAGCTCAGTCGATAGAGCATGAGACTCTTAATCTCAGGGTC-GTGGGTTTCGAGCCGCACGTTGGGCG | 1           |
| tRNA <sup>Lys</sup> CUU_V6  | GCCCCAGCTAGCTCAGTCGGTAGAGCATGAGACTCTTAATCTCAGGGTC-ATGGGTTTGAGCCCCACGTTGGGTG  | 1           |
| tRNA <sup>Lys</sup> CUU_V7  | GCCCTGGCTAGCTCAGTCGGCAAAGCATGAGACTCTTAATCTCAGGGTC-GTGGGCTCGAGCTCCATGTTGGGCG  | 1           |
| tRNA <sup>Lys</sup> CUU_V8  | GACGAGCTAGCTCAGTCGGTAGAGCATGGGACTCTTAATCCAGGGTC-GTGGGTTTGAGCCCCATGTTGGGCA    | 1           |
| tRNA <sup>Lys</sup> CUU_V9  | CTGCAGCTAGCTCAGTCGGTAGAGCATGAGACTCTTAATCTCAGGGTC-ATGGGTTTCGTGCCCCATGTTGGGTG  | 1           |
| tRNA <sup>Lys</sup> CUU_V10 | GCCCCAGCTAGCTCAGTCGGTAGAGCATAAGACTCTTAATCTCAGGGTT-GTGGATTTCGTGCCCCATGCTGGGTG | 1           |
| tRNA <sup>Lys</sup> CUU_V11 | GCCCCACTACCTCAGTCGGTGGAGCATGGGACTCTTCATCCAGGGTT-GTGGGTTTCGAGCCCCACATTGGGCA   | 1           |
| tRNA <sup>Lys</sup> CUU_V12 | GCTTAGCTAGATCAGTTGGTAGAGCATAAGACTCTTAATCTCAGGGTC-ATGGGTTTGAGCCCCATCGTTGGGCG  | 1           |
| tRNA <sup>Lys</sup> CUU_V13 | GCCCCAGCTAGCTCAGCCGGTAGAGCAAGACTCTTAATCTCAGGGTC-GTGGGTTTGAGCCCCGTGTTGAGCA    | 1           |
| tRNA <sup>Lys</sup> CUU_V14 | GCCCTGGCTACCTCAGTTGGTAGAGCATGGGACTCTTAATCCAGAGTCAGTGGGTTCAAGCCACATTGAGTG     | 1           |
| tRNA <sup>Lys</sup> CUU_V15 | ACCAGCATGTCTCAGTCGGTATAGTGTGAGACTCTTAATCTCAGGGTC-GTGGGTTCAAGCCCCACATTGGGCG   | 1           |
| tRNA <sup>Lys</sup> CUU_V16 | AACCGAATAGCTTAGTTGATGAAGCGTGAGACTCTTAATCTCAGGGTA-GTGGGTTCAAGCCCCACATTGGACA   | 1           |

**B**

|                             |                                                                                  | Genome loci |
|-----------------------------|----------------------------------------------------------------------------------|-------------|
| tRNA <sup>Glu</sup> CUC_V1  | TCCCTGGTGGTCTAGTGGTTA-GGATTCGGCGCTCTCA-CCGCCGGGCCCGGG-TTCGATTCCCAGGTCAGGGAA...   | 7           |
| tRNA <sup>Glu</sup> CUC_V2  | TCCCTGGTGGTCTAGTGGTTA-GGATTCGGCGCTCTCA-CCGCCGGGCCCGGG-TTCGATTCCCAGGTCAGGAAA...   | 1           |
| tRNA <sup>Glu</sup> CUC_V3  | CCCCGTGGTGGTCTAGTGCTTA-GGATTCGGTGCTCTCA-CCGCTGCTGCCGCGG-TTCGATTCCCAGGTCAGGGAA... | 1           |
| tRNA <sup>Glu</sup> CUC_V4  | TCCCTGGTGGTCTAATGGTTA-GGAGTCGGCACTCTCA-CCGCCGGGCTGGGG-TTGATTCCCAGTCAATGTAA...    | 1           |
| tRNA <sup>Glu</sup> CUC_V5  | CCCCGTGGCGGTCTAGTGGTTA-GGATTCGGCGCTCTCATCCACCGCGGCTGGG-TTCGACTCGTGGTCAGAGTG...   | 1           |
| tRNA <sup>Glu</sup> CUC_V6  | CCCCGTGGTGGTCTAGTGCTTA-GGATTGGCACTCTCG-CCACCGCAGCCGCGG-TTCAATTCCCAGGTCAGGGAA...  | 1           |
| tRNA <sup>Glu</sup> CUC_V7  | CCCCGTGTAGTCTAGTGGTTA-GAATTCGCGGCTCTCA-CAGCCGGGCCCGGG-TTCGATTCCCATTCCGGGAA...    | 1           |
| tRNA <sup>Glu</sup> CUC_V8  | CCCCGGTGGTGTAGTGGATG-GGATTGGCGCTCTCA-CCACCATGGCCGGA-TTGATTCCCAGGTCAGGGAA...      | 1           |
| tRNA <sup>Glu</sup> CUC_V9  | TCCCTTGGTGGTCTAGTGGTTA-GGATTCAACTCTCTCA-CCGCCGCAAGCCCGGG-TTGATTCCCAGGCAGGGAAAG.. | 1           |
| tRNA <sup>Glu</sup> CUC_V10 | TCCCTGCTTGTCTAGTGGTTA-GAATTCAGCACTCTCA-CTGCCACAGCCCAGG-TTCAATTCCCAGTCAAGAA...    | 1           |
| tRNA <sup>Glu</sup> CUC_V11 | TTATTATTATACCTGTGGTTA-GGATTCGGCGCTCTCA-CCGCCACGACCCCGGG-TTCAATTCCCAGGTCAGGGAA... | 1           |
| tRNA <sup>Glu</sup> CUC_V12 | CCCCGTGGTGGTCTATCGGTTA-GGATTCAGACTCTCTCA-CCACTGCTACCCATG-CTCGATTCCAGGTCAGGGAA... | 1           |
| tRNA <sup>Glu</sup> CUC_V13 | CCCCGTGGTGGTCTAGTGGTTA-GGCTTTGCGCTCTCTCA-GTGCCGCTGCCGCGG-TTGATTCCCAGTCAATGTGA... | 1           |
| tRNA <sup>Glu</sup> CUC_V14 | .TCCTTGATGTCTAGTGGTTA-GGATTGGTGCTCTCTCA-CTGCAGCAGCCGCGG-TTCAATTTCTCAGTCAGGGAA... | 1           |
| tRNA <sup>Glu</sup> CUC_V15 | .CTCTGGTGGTTTAGTGGCTA-GGATTCACCTCTCTCTCA-CTGCTGCAGCCCAGGGTTCCATTCCCAGGAGTCAGATG  | 1           |
| tRNA <sup>Glu</sup> CUC_V16 | TCCCTGGTGGTCTAGTGGCTA-AAGTTGGCGCTCTCTCA-CCGCCGGGACTGG----TTGATTCCAGATCAGGGGA...  | 1           |
| tRNA <sup>Glu</sup> CUC_V17 | TCCCTGGTGGTTCGGTGGTTA-GGATTGGCATTCTCTCA-CTGTTGTGGTCGGA-TTCAATCTGGCTTAGGGTA...    | 1           |
| tRNA <sup>Glu</sup> CUC_V18 | CCGTGGATAGCCAGCGGCTATGGAGCCGGGCTCTCTCA-CTCTGACGTCCTGGG-TTCAAGTCCCAGTGTGCACA...   | 1           |

*Honda et al. Figure S9*

# C

|                            |                                                                                                                                                                                                                | Genome loci |
|----------------------------|----------------------------------------------------------------------------------------------------------------------------------------------------------------------------------------------------------------|-------------|
| tRNA <sup>Val</sup> AAC_V1 | GTTTCCGTAGTGTAGTGGTTATCACGTTTCGCCTAACACGCGAAAGGTCCCCGGTTCGAAACCGGGCGGAAACA                                                                                                                                     | 5           |
| tRNA <sup>Val</sup> AAC_V2 | GTTTCCGTAGTGTAGTGGT <b>C</b> ATCACGTTTCGCCTAACACGCGAAAGGTCCCCGGTTCGAAACCGGGCGGAAACA                                                                                                                            | 1           |
| tRNA <sup>Val</sup> AAC_V3 | GTTTCCGTAGTGTAGTGGTTATCACGTTTCGCCTAACACGCGAAAGGTCC <b>G</b> CGGTTTCGAAACCGGGCGGAAACA                                                                                                                           | 1           |
| tRNA <sup>Val</sup> AAC_V4 | GTTTCCGTAGTGTAGTGGTTATCACGTT <b>T</b> GCCTAACACGCGAAAGGTCCCCGGTTCGAAACCGGGC <b>A</b> GAAACA                                                                                                                    | 1           |
| tRNA <sup>Val</sup> AAC_V5 | GTTTCCGTAGTGTAGTGGTTATCACGTTTCGCCTAACACGCGAAAGGTCCC <b>T</b> GGATC <b>A</b> AAACC <b>A</b> GGCGGAAACA                                                                                                          | 1           |
| tRNA <sup>Val</sup> AAC_V6 | GTTTCC <b>A</b> TAGTGT <b>A</b> CTGGTTATCAC <b>A</b> TT <b>C</b> ACCTAACACGCGAAAGGTCC <b>T</b> TGGTT <b>T</b> GAAACC <b>A</b> GGC <b>A</b> GAAACA                                                              | 1           |
| tRNA <sup>Val</sup> AAC_V7 | <b>G</b> GGGGTGTAG <b>C</b> TCAGTGGT- <b>A</b> GAGCGT <b>A</b> TGCT <b>T</b> AA <b>C</b> AT <b>T</b> CAT <b>G</b> AGG <b>C</b> T <b>T</b> GGGTTCG <b>A</b> TC <b>C</b> CC <b>A</b> GC <b>A</b> CT <b>T</b> CCA | 1           |

# D

|                             |                                                                                                                                                                                                                          | Genome loci |
|-----------------------------|--------------------------------------------------------------------------------------------------------------------------------------------------------------------------------------------------------------------------|-------------|
| tRNA <sup>Val</sup> CAC_V1  | GTTTCCGTAGTGTAGTGGTTATCACGTTTCGCCTCACACGCG-AAAGGTCCCCGGTTCGAAACCGGGCGGAAACA                                                                                                                                              | 6           |
| tRNA <sup>Val</sup> CAC_V2  | GTTTCCGTAGTGTAGTGGTTATCACGTTTCGCCTCACACGCG <b>T</b> AAAGGTCCCCGGTTCGAAACCGGGCGGAAACA                                                                                                                                     | 1           |
| tRNA <sup>Val</sup> CAC_V3  | GTTTCCGTAGTGTAGTGGTTATCACGTTTCGCCTCACACGCG-AAAGGTCCCCGGTTCGAAAC <b>T</b> GGGCGGAAACA                                                                                                                                     | 1           |
| tRNA <sup>Val</sup> CAC_V4  | GTTTCCGTAGT <b>G</b> AGTGGTTATCACGTTTCGCCTCACACGCG-AAAGGTCCCCGGT <b>T</b> GAAACC <b>A</b> GGCGGAAACA                                                                                                                     | 1           |
| tRNA <sup>Val</sup> CAC_V5  | GTTTCCGTAGTGTAG <b>C</b> GGTTATCAC <b>A</b> TT <b>C</b> GCCTCACACGCG-AAAGGTCCCCGGTTCG <b>A</b> TC <b>C</b> CGGGCGGAAACA                                                                                                  | 1           |
| tRNA <sup>Val</sup> CAC_V6  | <b>G</b> CTT <b>C</b> TGTAGTGTAGTGGTTATCACGTTTCGCCTCACACGCG-AAAGGTCCCCGGTTCGAAACCGGGC <b>A</b> G <b>A</b> GGCA                                                                                                           | 1           |
| tRNA <sup>Val</sup> CAC_V7  | GTTTCCGTAGTGTAGTGGTTAT <b>T</b> ATGTTTCGCCTCACACGCG-AAA <b>A</b> GTCCCCGGTTCG <b>A</b> AA <b>T</b> C <b>A</b> GGCGG <b>G</b> AAACA                                                                                       | 1           |
| tRNA <sup>Val</sup> CAC_V8  | GTTT <b>C</b> TGTAGT <b>A</b> TGGTGGTTATCACGTT <b>A</b> GTCTCACACG <b>T</b> G-AAAGGTCCC <b>T</b> GGTTCGAAACC <b>A</b> GG <b>T</b> G <b>G</b> AAACA                                                                       | 1           |
| tRNA <sup>Val</sup> CAC_V9  | GTTT <b>C</b> TGT <b>G</b> GTGTAGTGGTTAT <b>C</b> ATGTTTCGCCTCACACG <b>A</b> G-AAA <b>A</b> GTCCC <b>T</b> G <b>A</b> TT <b>C</b> G <b>A</b> G <b>A</b> CT <b>G</b> GGT <b>G</b> GG <b>A</b> AC <b>G</b>                 | 1           |
| tRNA <sup>Val</sup> CAC_V10 | <b>G</b> CTT <b>C</b> T <b>G</b> T <b>A</b> ATGTAGTGGTTATCAC <b>A</b> TT <b>C</b> GCCTCACAC <b>A</b> T <b>G</b> -AAAGGT <b>C</b> ACC <b>A</b> GT <b>T</b> T <b>G</b> AGACCGGGC <b>C</b> AA <b>A</b> ACA                  | 1           |
| tRNA <sup>Val</sup> CAC_V11 | <b>T</b> TTT <b>C</b> TGTAGTGTAGT <b>T</b> GT <b>T</b> AA <b>C</b> ACGTTTCGCCTCACACG <b>T</b> TAAAG <b>T</b> T <b>C</b> T <b>T</b> GGTT <b>G</b> GAT <b>A</b> CC <b>A</b> G <b>A</b> T <b>G</b> GAA <b>T</b> G           | 1           |
| tRNA <sup>Val</sup> CAC_V12 | GTTT <b>C</b> TGTAGT <b>A</b> TAGTGGTTAT <b>C</b> ATGTT <b>T</b> GCCTCACAT <b>G</b> T <b>G</b> -AAAG <b>A</b> CC <b>T</b> T <b>G</b> G <b>C</b> TCG <b>A</b> G <b>A</b> CT <b>G</b> G <b>A</b> GG <b>A</b> AA <b>C</b> A | 1           |
| tRNA <sup>Val</sup> CAC_V13 | GTTT <b>C</b> TGT <b>G</b> GTGTAGTGGTTAT <b>T</b> ATGTTTCG <b>T</b> TCACAT <b>A</b> T <b>G</b> -AAAGGT <b>C</b> T <b>T</b> GGTTCG <b>A</b> G <b>A</b> CT <b>G</b> CG <b>T</b> GG <b>G</b> AA <b>C</b> A                  | 2           |
| tRNA <sup>Val</sup> CAC_V14 | <b>G</b> CACT <b>G</b> GT <b>G</b> GT <b>T</b> CAGTGGT- <b>A</b> GA <b>T</b> T <b>C</b> TCGCCTCACACGCG-- <b>G</b> GACACCCGGG <b>T</b> T <b>C</b> A <b>T</b> T <b>C</b> CG <b>G</b> T <b>C</b> A <b>G</b> GG <b>C</b> A   | 1           |

# E

|                             |                                                                                                                                                                                                                                                                                       | Genome loci |
|-----------------------------|---------------------------------------------------------------------------------------------------------------------------------------------------------------------------------------------------------------------------------------------------------------------------------------|-------------|
| tRNA <sup>Gln</sup> CUG_V1  | ...GGTTCATGGTGTAAATGGTT-AGCACTCTGGACTCTGAATCCAGCGAT--CCGAGTTCAAATCTCGGTG-GAACCT...                                                                                                                                                                                                    | 5           |
| tRNA <sup>Gln</sup> CUG_V2  | ...GGTTCATGGTGTAAATGGTT-AGCACTCTGGACTCTGAATCCAGCGAT--CCGAGTTCAAG <b>T</b> CTCGGTG-GAACCT...                                                                                                                                                                                           | 1           |
| tRNA <sup>Gln</sup> CUG_V3  | ...GGTTCATGGTGTAAATGGTT-AGCACTCTGGACTCTGAATCC <b>G</b> G <b>T</b> AAT--CCGAGTTCAAATCTCGGTG-GAACCT...                                                                                                                                                                                  | 1           |
| tRNA <sup>Gln</sup> CUG_V4  | ...GGTTCATGGTGTAAATGGT <b>G</b> -AGCACTCTGGACTCTGAATCCAGCGAT--CCGAGTT <b>C</b> G <b>A</b> G <b>T</b> CTCGGTG-GAACCT...                                                                                                                                                                | 2           |
| tRNA <sup>Gln</sup> CUG_V5  | ...GGTTCATGGTGTAAATGGT <b>A</b> -AGCACTCTGGACTCTGAATCCAGCGAT--CCGAGTT <b>C</b> G <b>A</b> G <b>T</b> CTCGGTG-GAACCT...                                                                                                                                                                | 2           |
| tRNA <sup>Gln</sup> CUG_V6  | ...GG <b>CC</b> CCATGGTGTAAATGGT <b>C</b> -AGCACTCTGGACTCTGAATCCAGCGAT--CCGAGTTCAAATCTCGGTG- <b>G</b> GAC <b>CC</b> ...                                                                                                                                                               | 1           |
| tRNA <sup>Gln</sup> CUG_V7  | ...GGTTCATGG <b>G</b> TAAATGGT <b>G</b> -AGCAC <b>C</b> TGGACTCTGAAT <b>C</b> AAGCGAT--CCGAGTTCAAATCTCGGTG- <b>G</b> TAC <b>CT</b> ...                                                                                                                                                | 1           |
| tRNA <sup>Gln</sup> CUG_V8  | ...GGTTCATGGTGTAAATGGT <b>A</b> -AGCACTCTGGACTCTGAATCCAGC <b>C</b> AT-- <b>C</b> TGAGTT <b>C</b> G <b>A</b> G <b>T</b> CT <b>C</b> T <b>G</b> TG-GAACCT...                                                                                                                            | 1           |
| tRNA <sup>Gln</sup> CUG_V9  | ...GGTTCATGGTGTAAATGGT <b>G</b> - <b>A</b> CCACT <b>T</b> TGGACTCTGAAT <b>A</b> CAGT <b>G</b> AT-- <b>C</b> AGAGTTCAAG <b>T</b> CT <b>C</b> ACT <b>G</b> -GAACCT...                                                                                                                   | 1           |
| tRNA <sup>Gln</sup> CUG_V10 | ...GGTTCATGGTGTAAATGGT <b>G</b> -AGCACT <b>T</b> TGGACTCTGAAT <b>A</b> CAGT <b>G</b> AT-- <b>C</b> AGAGTTCAAG <b>T</b> CT <b>C</b> ACT <b>G</b> -GGACCT...                                                                                                                            | 1           |
| tRNA <sup>Gln</sup> CUG_V11 | ...GGTTCATGGTGTAAATGGT <b>A</b> -AGCAC <b>C</b> TGGACTCTGAATCCAGC <b>A</b> C-- <b>C</b> AGAGTT <b>C</b> C <b>A</b> G <b>T</b> CT <b>C</b> A <b>G</b> CGT <b>G</b> ACCT...                                                                                                             | 2           |
| tRNA <sup>Gln</sup> CUG_V12 | ...GGTTCATGGTGTAAATGGT <b>G</b> - <b>A</b> GG <b>C</b> T <b>T</b> TGGACTCTG <b>A</b> CT <b>A</b> CAGT <b>G</b> AT-- <b>C</b> AGAGTTCAAG <b>T</b> CT <b>C</b> A <b>G</b> T <b>G</b> -GGACCT...                                                                                         | 1           |
| tRNA <sup>Gln</sup> CUG_V13 | ...GGTTCATG <b>A</b> TGTAAATGGT <b>G</b> -AGC <b>G</b> C <b>T</b> TGGACTCTG <b>A</b> G <b>T</b> AC <b>G</b> GT <b>G</b> AT-- <b>C</b> AG <b>C</b> GT <b>T</b> CAAG <b>T</b> CT <b>C</b> A <b>G</b> T <b>G</b> -GGACCT...                                                              | 1           |
| tRNA <sup>Gln</sup> CUG_V14 | ...GG <b>C</b> A <b>G</b> TATGGT <b>A</b> GAGTGGTT- <b>A</b> GA <b>T</b> CAT <b>G</b> A <b>A</b> CTCTGAAG <b>T</b> CAGAGATA <b>C</b> TTGA <b>A</b> TT <b>G</b> AAT <b>G</b> CTGGT <b>T</b> CT <b>G</b> T <b>C</b> A...                                                                | 1           |
| tRNA <sup>Gln</sup> CUG_V15 | GT <b>G</b> AG <b>A</b> CT <b>G</b> CA <b>C</b> AG <b>CC</b> AGTGGT <b>G</b> - <b>C</b> AGGG <b>C</b> AT <b>G</b> G-CTCTG <b>A</b> CA <b>CC</b> T <b>G</b> G- <b>C</b> G <b>CC</b> T <b>G</b> GGTTCAAAT <b>C</b> CA <b>G</b> CT <b>T</b> CT <b>A</b> C...                             | 1           |
| tRNA <sup>Gln</sup> CUG_V16 | ...GGT <b>A</b> G <b>T</b> GTAGT <b>C</b> TACTGGTT-AA <b>A</b> CG <b>C</b> T <b>T</b> GGG <b>C</b> TG <b>A</b> C <b>A</b> TT <b>A</b> A-- <b>C</b> GT <b>C</b> T <b>G</b> GGTTCAAAT <b>C</b> CA <b>G</b> CT <b>T</b> T <b>G</b> T <b>C</b> A...                                       | 1           |
| tRNA <sup>Gln</sup> CUG_V17 | ... <b>G</b> A <b>G</b> CT <b>G</b> T <b>A</b> -- <b>G</b> CATAGT <b>A</b> TT- <b>A</b> GG <b>A</b> CAT <b>G</b> GACTCT <b>G</b> A <b>G</b> CC <b>A</b> AAT <b>C</b> TG <b>C</b> CT <b>G</b> GGT <b>T</b> CTAG <b>T</b> CC <b>A</b> G <b>T</b> CT <b>G</b> T <b>C</b> T <b>C</b> A... | 1           |
| tRNA <sup>Gln</sup> CUG_V18 | ... <b>C</b> TAG <b>G</b> A <b>C</b> TGGTGTAAAT <b>A</b> GGT-AGCAC <b>A</b> G <b>A</b> GA <b>A</b> TTCT <b>G</b> AT <b>T</b> CT <b>C</b> AG <b>G</b> G-- <b>G</b> TAGGTTCAAT <b>T</b> C <b>T</b> AT <b>A</b> G-- <b>A</b> AC <b>T</b> AG <b>G</b>                                     | 1           |
| tRNA <sup>Gln</sup> CUG_V19 | ...GG <b>C</b> A <b>G</b> TGTAG <b>CC</b> CAGAGGTT <b>C</b> A <b>GG</b> G <b>C</b> AT <b>TC</b> GCTCT <b>G</b> TAT <b>C</b> AG <b>A</b> GGG <b>T</b> CTGGGTTCAAAT <b>C</b> CT <b>T</b> T <b>G</b> T <b>C</b> ACT <b>G</b> CT <b>T</b> .                                               | 1           |

# F

|                             |                                                                                                                                                                                              | Genome loci |
|-----------------------------|----------------------------------------------------------------------------------------------------------------------------------------------------------------------------------------------|-------------|
| tRNA <sup>Lys</sup> UUU-V1  | GCCCCGGATAGCTCAGTCGGGTAGAGC-ATCAGACTTTTAAATCTGAGGGTCCAGGGTTCAAGTCCCTGTTTCGGGCG                                                                                                               | 5           |
| tRNA <sup>Lys</sup> UUU-V2  | GCCCCGGATAGCTCAGTCGGGTAGAGC-ATCAGACTTTTAAATCTGAGGGTCCGGGGTTCAAGTCCCTGTTTCGGGCG                                                                                                               | 1           |
| tRNA <sup>Lys</sup> UUU-V3  | GCC <sup>T</sup> GGATAGCTCAGTCGGGTAGAGC-ATCAGACTTTTAAATCTGAGGGTCCAGGGTTCAAGTCCCTGTTCA <sup>AGGCG</sup>                                                                                       | 1           |
| tRNA <sup>Lys</sup> UUU-V4  | GCC <sup>T</sup> GGATAGCTCAGT <sup>T</sup> GGTAGAGC-ATCAGACTTTTAAATCTGAGGGTCCAGGGTTCAAGTCCCTGTTCA <sup>AGGCG</sup>                                                                           | 1           |
| tRNA <sup>Lys</sup> UUU-V5  | GCC <sup>T</sup> GGATAGCTCAGT <sup>T</sup> GGTAGAGC-ATCAGACTTTTAAATCTGAGGGTCCAGGGTTCAAGTCCCTGTTCA <sup>AGGCA</sup>                                                                           | 1           |
| tRNA <sup>Lys</sup> UUU-V6  | GCC <sup>T</sup> GG <sup>G</sup> TAGCTCAGTCGGGTAGAGC-ATCAGACTTTTAAATCTGAGGGTCCAGGGTTCAAGTCCCTGT <sup>CC</sup> AGGCG                                                                          | 1           |
| tRNA <sup>Lys</sup> UUU-V7  | GCCCCGGA <sup>G</sup> AGCTCAGT <sup>G</sup> GGTAGAGC-ATCAGACTTTTAAATCTGAGGGTCCAGGGTTCAAGTCC <sup>TC</sup> GTTTCGGGCA                                                                         | 1           |
| tRNA <sup>Lys</sup> UUU-V8  | GCC <sup>T</sup> GGATAGCTCAGT <sup>T</sup> GGTAGA <sup>AC</sup> -ATCAGACTTTTAAATCTGA <sup>CGGT</sup> GCAGGGTTCAAGTCCCTGTTCA <sup>AGGCG</sup>                                                 | 1           |
| tRNA <sup>Lys</sup> UUU-V9  | <sup>ACCC</sup> AGATAGCTCAGTCA <sup>GT</sup> AGAGC-ATCAGACTTTTAAATCTGAGGGTCCA <sup>AGGTTCA</sup> TGTCCCT <sup>TTTT</sup> TGGG <sup>TG</sup>                                                  | 1           |
| tRNA <sup>Lys</sup> UUU-V10 | <sup>ACCT</sup> GG <sup>G</sup> TAGCTCAGT <sup>AGG</sup> TAGA <sup>AC</sup> -ATCAGACTTTTAAATCTGAGGGT <sup>CT</sup> AGGGTTCAAGTCCCTGT <sup>CC</sup> AGGCG                                     | 1           |
| tRNA <sup>Lys</sup> UUU-V11 | GCC <sup>AGG</sup> ATAG <sup>TTC</sup> AG <sup>GT</sup> GGTAGAGC-ATCAGACTTTTAA <sup>CCT</sup> GAGGGT <sup>TC</sup> AGGGTTCAAGT <sup>CT</sup> CTGTT <sup>TGGGCG</sup>                         | 1           |
| tRNA <sup>Lys</sup> UUU-V12 | <sup>ACCC</sup> AGATAGCTCAGT <sup>TG</sup> ATAGAGC-ATCAGACTTTTAAATCTGAGGGTCCAGGGTTCA <sup>TGT</sup> CCCTGTT <sup>CTTAA</sup>                                                                 | 1           |
| tRNA <sup>Lys</sup> UUU-V13 | GCC <sup>T</sup> GG <sup>G</sup> TAGCTCAGTCGGGTAGAGC <sup>TAT</sup> CAGACTTTT <sup>AGCCT</sup> GAGGA <sup>ATTC</sup> AGGGTTCA <sup>ATCCCT</sup> TG <sup>CT</sup> GGGGCG                      | 1           |
| tRNA <sup>Lys</sup> UUU-V14 | <sup>ACCT</sup> GG <sup>G</sup> TAGCT <sup>T</sup> AGT <sup>T</sup> GGTAGAGC-AT <sup>TGG</sup> ACTTTTAA <sup>TT</sup> GAGGG <sup>CC</sup> AGG <sup>TTT</sup> CAAGTCCCTGTT <sup>TGGG</sup> TG | 1           |
| tRNA <sup>Lys</sup> UUU-V15 | <sup>GTT</sup> GGG <sup>GTA</sup> ACTCAGT <sup>T</sup> GGTAGAG <sup>T</sup> -AGCAGACTTTT <sup>CAT</sup> CTGAGGGTCCAGGGTT <sup>TAAGTCC</sup> ATGT <sup>CC</sup> AGGCA                         | 1           |
| tRNA <sup>Lys</sup> UUU-V16 | . <sup>.TCCT</sup> ATAGCCAGT <sup>GAT</sup> TAG <sup>GAT</sup> - <sup>TCTTTG</sup> CTTTTACT <sup>ACC</sup> ATGACT <sup>TGGG</sup> -TTCAAT <sup>ACCC</sup> AGT <sup>CAGGGAA</sup>             | 1           |
| tRNA <sup>Lys</sup> UUU-V17 | . <sup>ACC</sup> TGT <sup>GGTAC</sup> AGGGG <sup>CTA</sup> ATAT- <sup>GCTGGG</sup> C <sup>TTTACC</sup> ACT <sup>TCAG</sup> CCAGG- <sup>TTCG</sup> ATTCC <sup>TGGT</sup> CAGGGAA              | 1           |

# G

|                            |                                                                                                                                                                                             | Genome loci |
|----------------------------|---------------------------------------------------------------------------------------------------------------------------------------------------------------------------------------------|-------------|
| tRNA <sup>Gly</sup> GCC-V1 | GCATTGGTGGTTTCAGTGGTAGAATTCTCGCCTGCCACGCGGGAGGCC <sup>C</sup> GGGTTTCGATTCCC <sup>CGCC</sup> AAATGCA                                                                                        | 6           |
| tRNA <sup>Gly</sup> GCC-V2 | GCAT <sup>GGG</sup> TGGTTTCAGTGGTAGAATTCTCGCCTGCCACGCGGGAGGCC <sup>CGG</sup> TTCGATTCCC <sup>CGCC</sup> CATGCA                                                                              | 5           |
| tRNA <sup>Gly</sup> GCC-V3 | GCATTGGTGGTTTCAGTGGTAGAATTCTCGCCTGCCACGCGGGAGGCC <sup>CGG</sup> T <sup>T</sup> GATTCCC <sup>CGCC</sup> AG <sup>T</sup> GCA                                                                  | 1           |
| tRNA <sup>Gly</sup> GCC-V4 | GCATTGGTGGTTTCAGTGGTAGAATTCTCGCCTGCCA <sup>T</sup> GCGGG <sup>CGG</sup> CC <sup>GGG</sup> CTTCGATTCC <sup>TGG</sup> CCAATGCA                                                                | 1           |
| tRNA <sup>Gly</sup> GCC-V5 | GCAT <sup>AGG</sup> TGGTTTCAGTGGTAGAATTCT <sup>TG</sup> CCCTGCCACGC <sup>AGG</sup> AGGCC <sup>AGG</sup> TT <sup>T</sup> GATTCC <sup>TGG</sup> CCATGCA                                       | 1           |
| tRNA <sup>Gly</sup> GCC-V6 | GCAT <sup>GGG</sup> TG <sup>ATT</sup> CAGTGGTAGAATT <sup>TT</sup> CA <sup>CT</sup> GCCAT <sup>GC</sup> AGGAGG <sup>TCC</sup> AGGTT <sup>CAT</sup> TTCC <sup>TGG</sup> CC <sup>T</sup> ATGCA | 1           |

*Honda et al. Figure S9*
